# Supplementary material for: Photoinduced monooxygenation involving NAD(P)H-FAD sequential single-electron transfer
Source: PubMed Central journal article supplement (PMC7248105; doi:10.1038/s41467-020-16450-y), 2020-05-25
Supplement: 41467_2020_16450_MOESM1_ESM.pdf [file 41467_2020_16450_MOESM1_ESM.pdf]

Supplementary information

## Photoinduced monooxygenation involving NAD(P)H-FAD sequential single-electron transfer

Ernst et al.

**Supplementary Table 1:** Michaelis-Menten kinetics of the photoreduction of PqsL, PqsL-O and PqsL-Q. Kinetic parameters were determined in three independent experiments. Experiments were conducted at room temperature with 10  $\mu\text{M}$  PqsL, 200  $\mu\text{M}$  2-ABA (if indicated) and 1.25 mM NADH/NADPH in 30 mM phosphate/borate buffer, pH 8.3. Illumination was provided by a single LED ( $\lambda_{\text{max}}=466$  nm, 20 nm full width at half maximum (FWHM), 1050  $\mu\text{mol photons s}^{-1} \text{m}^{-2}$ ).

|                |                                                        | <b>NADH</b>        | <b>NADPH</b>        | <b>NADH+2-ABA</b>   | <b>NADPH+2-ABA</b>  |
|----------------|--------------------------------------------------------|--------------------|---------------------|---------------------|---------------------|
| <b>PqsL wt</b> | $K_M$ ( $\mu\text{M}$ )                                | 310.9 $\pm$ 21.95  | 157.5 $\pm$ 18.87   | 31.40 $\pm$ 7.82    | 13.85 $\pm$ 2.291   |
|                | $k_{\text{cat}}$ ( $\text{s}^{-1}$ )                   | 0.56 $\pm$ 0.016   | 0.605 $\pm$ 0.025   | 0.168 $\pm$ 0.009   | 0.181 $\pm$ 0.005   |
|                | $k_{\text{cat}}/K_M$ ( $\text{s}^{-1} \text{M}^{-1}$ ) | 1.80 $\times 10^3$ | 3.84 $\times 10^3$  | 5.35 $\times 10^3$  | 13.06 $\times 10^3$ |
| <b>PqsL-O</b>  | $K_M$ ( $\mu\text{M}$ )                                | 175.05 $\pm$ 12.55 | 127.8 $\pm$ 10.6    | 10.24 $\pm$ 1.481   | 7.338 $\pm$ 1.651   |
|                | $k_{\text{cat}}$ ( $\text{s}^{-1}$ )                   | 0.342 $\pm$ 0.009  | 0.338 $\pm$ 0.0503  | 0.17 $\pm$ 0.005    | 0.147 $\pm$ 0.004   |
|                | $k_{\text{cat}}/K_M$ ( $\text{s}^{-1} \text{M}^{-1}$ ) | 1.96 $\times 10^3$ | 2.645 $\times 10^3$ | 16.63 $\times 10^3$ | 20.06 $\times 10^3$ |
| <b>PqsL-Q</b>  | $K_M$ ( $\mu\text{M}$ )                                | 353.5 $\pm$ 31.18  | 109.4 $\pm$ 12.84   | 35.03 $\pm$ 6.881   | 24.41 $\pm$ 3.264   |
|                | $k_{\text{cat}}$ ( $\text{s}^{-1}$ )                   | 0.311 $\pm$ 0.012  | 0.262 $\pm$ 0.009   | 0.084 $\pm$ 0.004   | 0.082 $\pm$ 0.002   |
|                | $k_{\text{cat}}/K_M$ ( $\text{s}^{-1} \text{M}^{-1}$ ) | 0.88 $\times 10^3$ | 2.39 $\times 10^3$  | 2.4 $\times 10^3$   | 3.36 $\times 10^3$  |

**Supplementary Table 2:** Plasmids used in this study. Plasmids for the expression of *pqsL*-variants in *P. putida* and *E. coli*. pSE2 corresponds to the pHERD30T plasmid harboring wild type *pqsL* gene carrying sequences coding for an N-terminal 8x-histidine tag and a TEV protease cleavage site. Plasmids highlighted in bold were used for heterologous expression in *E. coli* and purification of the respective gene products. *In vivo* activities were determined in at least 2 biological replicates.

| Plasmid        | Mutation in <i>pqsL</i>                      | <i>In vivo</i> activity rel. to wild type <i>pqsL</i> (%) |
|----------------|----------------------------------------------|-----------------------------------------------------------|
| pSE2-A         | R41Y, I43R                                   | 27.34                                                     |
| pSE2-B         | I43R                                         | 25.43                                                     |
| pSE2-C         | G45R                                         | 27.34                                                     |
| pSE2-D         | A164H                                        | 74.09                                                     |
| pSE2-E         | G275R                                        | 24.65                                                     |
| pSE2-F         | R41Y, I43R, G45R                             | 34.76                                                     |
| pSE2-G         | I43R, G45R                                   | 22.93                                                     |
| pSE2-H         | A164H, G275R                                 | 26.87                                                     |
| pSE2-I         | R41Y, I43R, G45R, A164H                      | 12.49                                                     |
| pSE2-J         | R41Y, I43R, G45R, G275R                      | 12.56                                                     |
| pSE2-K         | I43R, G45R, A164H                            | 3.82                                                      |
| pSE2-L         | I43R, G45R, G275R                            | 1.66                                                      |
| pSE2-M         | R41Y, I43R, G45R, A164H, G275R               | 2.56                                                      |
| pSE2-N         | I43R, G45R, A164H, G275R                     | 0.98                                                      |
| <b>pSE2-O</b>  | <b>C105G</b>                                 | <b>97.11</b>                                              |
| <b>pSE2-P</b>  | <b>G45R, C105G</b>                           | <b>72.35</b>                                              |
| <b>pSE2-Q</b>  | <b>R41Y, I43R, G45R, C105G</b>               | <b>71.61</b>                                              |
| <b>pSE2-R</b>  | <b>R41Y, I43R, G45R, C105G, A164H</b>        | <b>52.29</b>                                              |
| pSE2-S         | R41Y, I43R, G45R, C105G, A164H, G275R        | 20.36                                                     |
| pSE2-T         | R178S                                        | 72.65                                                     |
| pSE2-U         | R178S, G275R                                 | 93.50                                                     |
| pSE2-V         | A164H, R178S, G275R                          | 53.71                                                     |
| pSE2-W         | R41Y, I43R, G45R, C105G, A164H, R178S, G275R | 60.74                                                     |
| pSE2-X         | R41Y, I43R, C105G                            | 71.72                                                     |
| pSE2-Y         | G45H, C105G                                  | 40.14                                                     |
| pSE2-Z         | R41Y, I43R, G45H, C105G, A164H               | 37.06                                                     |
| pSE2-AA        | Q36R                                         | 104.45                                                    |
| pSE2-AB        | Q36R, A37Q                                   | 85.06                                                     |
| pSE2-AC        | Q36R, G45R, C105G                            | 15.86                                                     |
| pSE2-AD        | Q36R, A37Q, G45R, C105G                      | 29.26                                                     |
| pSE2-AE        | G45R, C105G, A164H                           | 12.75                                                     |
| pSE2-AF        | P273G                                        | 66.64                                                     |
| <b>pSE2-AG</b> | <b>P273A</b>                                 | <b>78.72</b>                                              |

**Supplementary Table 3:** Primers for site-directed mutagenesis, chromosomal integration of *pqsL* in *P. aeruginosa* and cloning of *6xhis-pqsL* in pHERD30T used in this study.

| Purpose                                  | Primer Name                                    | Primer Sequence                                                                              |
|------------------------------------------|------------------------------------------------|----------------------------------------------------------------------------------------------|
| Mutagenesis Q36R                         | pqsL-Q36R-F<br>pqsL-Q36R-R                     | TGGTAGTGGAACGGGCACGGCGCGAAC<br>GTTTCGCGCCGTGCCCGTTCCACTACCA                                  |
| Mutagenesis A37Q                         | pqsL-A37Q-F<br>pqsL-A37Q-R                     | TGGTAGTGGAACAGCAACGGCGCGAAC<br>GTTTCGCGCCGTGCTGTTCCACTACCA                                   |
| Mutagenesis Q36R A37Q                    | pqsL-Q36R-A37Q-F<br>pqsL-Q36R-A37Q-R           | TGGTAGTGGAACGGCAACGGCGCGAAC<br>GTTTCGCGCCGTGCCCGTTCCACTACCA                                  |
| Mutagenesis R41Y I43R                    | PqsL-R41Y-I43R-F<br>pqsL-R41Y-I43R-R           | CACGGCGCGAATACGCGCGCAACGGCGCCGACCTGCTCAAG<br>GTCGGCGCCGTTGCGCGCGTATTGCGCCCGTGCCTGTTCCAC      |
| Mutagenesis R41Y I43R G45R               | pqsL-R41Y-I43R-G45R-F<br>pqsL-R41Y-I43R-G45R-R | GAATACGCGCGCAACCGCGCCGACCT<br>GCTTGAGCAGGTCGGCGCGGTTGCG                                      |
| Mutagenesis I43R                         | pqsL-I43R-F<br>pqsL-I43R-R                     | GCGAACGCGCGCGCAACGGCGCCGACCTGCTCAAG<br>GTCGGCGCCGTTGCGCGCGGTTTCGCGCCGTG                      |
| Mutagenesis I43R G45R                    | pqsL-I43R-PqsL-G45R-F<br>pqsL-I43R-PqsL-G45R-R | GAACGCGCGCGCAACCGCGCCGACCT<br>CGGCTTGAGCAGGTCGGCGCGGTTGCG                                    |
| Mutagenesis N44L                         | pqsL-N44L-F<br>pqsL-N44L-R                     | ACGCGCGATCCTCGCGCCGACCTG<br>GTCGGCGCCGAGGATCGCGCGTTTCGCG                                     |
| Mutagenesis N44D                         | pqsL-N44D-F<br>pqsL-N44D-R                     | ACGCGCGATCGACGGCGCCGACCTG<br>GTCGGCGCCGTCGATCGCGCGTTTCGCG                                    |
| Mutagenesis G45R                         | pqsL-G45R-F<br>pqsL-G45R-R                     | CGCGATCAACCGCGCCGACCTGCTCAAGCCGGC<br>GGTCGGCGCGGTTGATCGCGCGTTTCGCGCCG                        |
| Mutagenesis G45H                         | pqsL-G45H-F<br>pqsL-G45H-R                     | CGCGATCAACCACGCCGACCTGCTCAAGCCGGC<br>GGTCGGCGTGTTGATCGCGCGTTTCGCGCCG                         |
| Mutagenesis C105G                        | pqsL-C105G-F<br>pqsL-C105G-R                   | CGGCTATTTATCCTCATGCCCGCGAGTTCG<br>TACCAGGCGCGCAGCGACTCGCCGGGCATGAG                           |
| Mutagenesis A164H                        | pqsL-A164H-F<br>pqsL-A164H-R                   | CCGACGGTATCCACTCCTACGTGCGCCGCCGGCTG<br>GCACGTAGGAGTGGATAACCGTTCGCTCCACCACC                   |
| Mutagenesis R178S                        | pqsL-R178S-F<br>pqsL-R178S-R                   | GATATCGATGTGAAAGCCGCCCTACCC<br>GACGGGTAGGGGCGGCTTCCACATC                                     |
| Mutagenesis G275R                        | pqsL-G275R-F<br>pqsL-G275R-R                   | GCATCCCATCCGCTACCTGAACCTGGACCGCTACTGG<br>GGTTCAGGTAGCGGATGGGGATGCCCTTGAAGCGC                 |
| Mutagenesis P273G                        | pqsL-P273G-F<br>pqsL-P273-R                    | GGCATCGGCATCGGCTACCTGAACC<br>GTAGCCGATGCCGATGCCCTTGAAGC                                      |
| Mutagenesis P273A                        | pqsL-P273A-F<br>pqsL-P273A                     | GGCATCCGCATCGGCTACCTGAACC<br>GTAGCCGATGGCGATGCCCTTGAAGC                                      |
| Genomic complementation of $\Delta$ pqsL | pqsL-gComp-5'<br>pqsL-gComp-3'                 | GGAACGACACGGAGACTCATCCATGACGGACAACCATATCGAT<br>CTCCGGCCGCGCTGGCGGGTTCAGCCGAGCGGCGC           |
| Cloning 6xHis-PqsL in pHERD30T           | pqsL-pSE2-F<br>pqsL-pSE2-R                     | TTAACTTTAAGAAGGAGATATACATACCCAATGGGCAGCAGCCATCAT<br>CCCAGATGCCGCTGGATCTGGCTCAGCCGAGCGGCGCCGG |

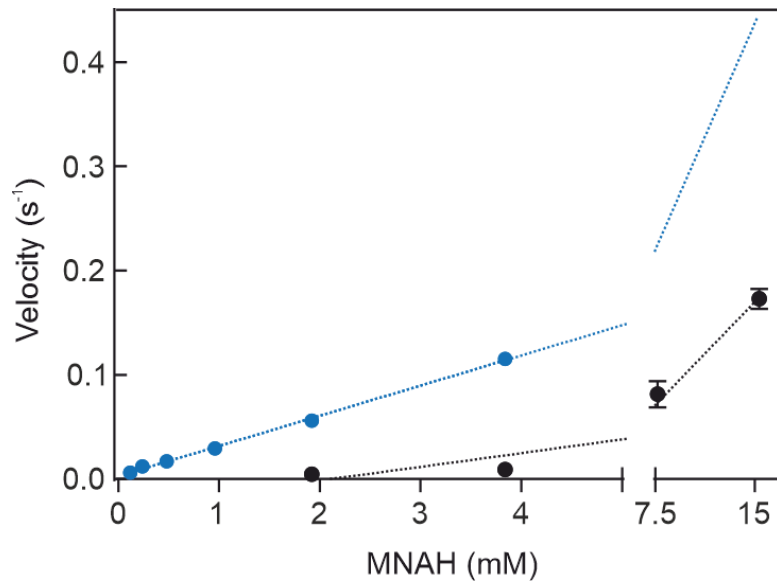

**Supplementary Figure 1:** Steady-state kinetics of FAD (blue) and PqsL (black) reactions with MNAH monitored by oxygen consumption. FAD concentration was kept constant at 10  $\mu\text{M}$  and reactions were carried out at 25°C and atmospheric pressure. Bimolecular rates were determined from linear fits, assuming that flavin reoxidation rates were constant ( $k_{\text{PqsL}} = 1 \times 10^{-3} \text{ s}^{-1} \text{ mM}^{-1}$ ,  $k_{\text{FAD}} = 3 \times 10^{-3} \text{ s}^{-1} \text{ mM}^{-1}$ ). Error bars reflect standard deviations of  $n \geq 3$ .

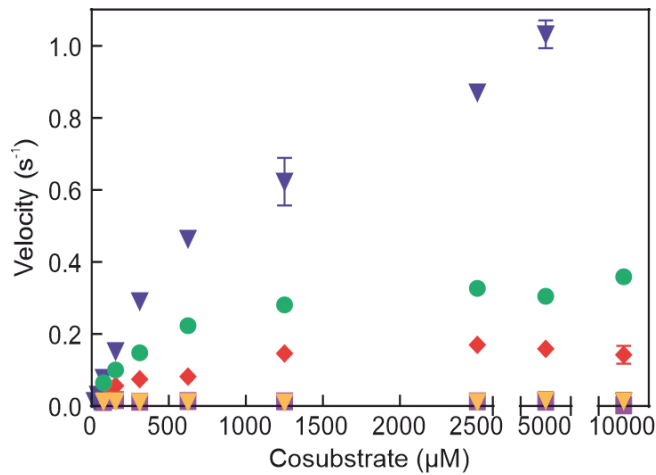

**Supplementary Figure 2:** Steady-state kinetics of PqsL photoreduction with various electron donors, as assayed by O<sub>2</sub> consumption (LED light source,  $\lambda_{\text{max}} = 466$  nm, 20 nm full width at half maximum, 1050  $\mu\text{mol photons s}^{-1} \text{m}^{-2}$ ). Blue triangles: 1-methyl-1,4-dihydronicotinamide, red diamonds: ascorbic acid, green circles: EDTA, purple squares: triethylamine, orange triangles: L-glycine. Rates of the PqsL reactions were corrected for the contribution of residual free FAD (calculated based on the  $K_d$  of the PqsL-FAD complex). Error bars indicate SD of three identical measurements.

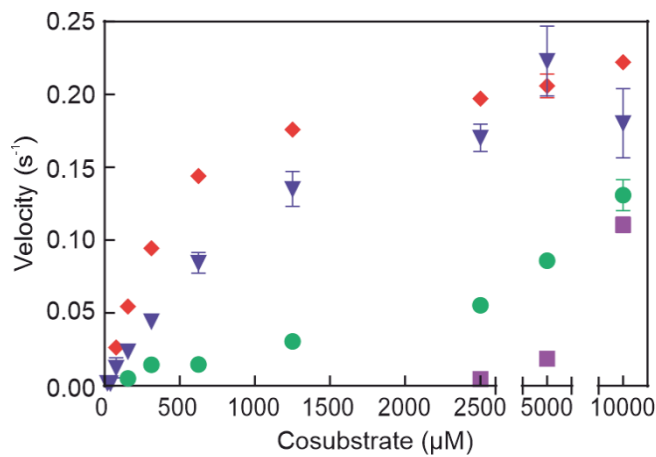

**Supplementary Figure 3:** Kinetics of FAD photoreduction with various electron donors, as assayed by O<sub>2</sub> consumption (LED light source,  $\lambda_{\text{max}} = 466$  nm, 20 nm full width at half maximum, 1050  $\mu\text{mol photons s}^{-1} \text{m}^{-2}$ ). Blue triangles: 1-methyl-1,4-dihydronicotinamide, red diamonds: ascorbic acid, green circles: EDTA, purple squares: triethylamine. Error bars indicate SD of three identical measurements.

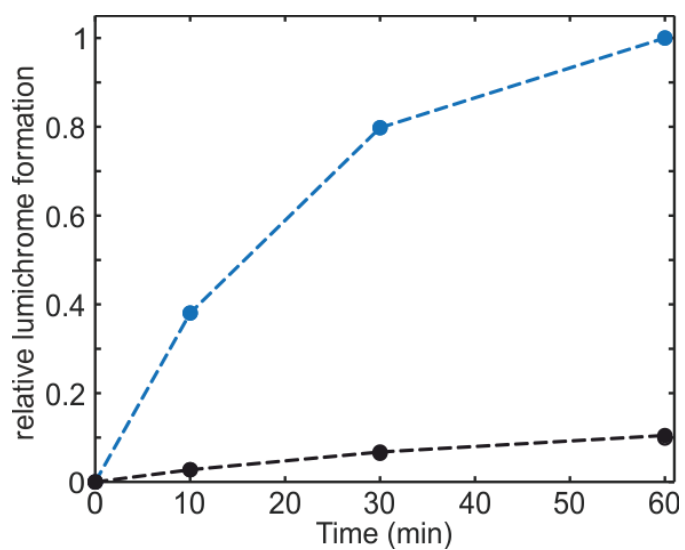

**Supplementary Figure 4:** Photodegradation of FAD. 500  $\mu\text{M}$  of free FAD (blue) or PqsL (black) were illuminated in 20 mM tris-Cl, pH 8.5 with a blue light LED ( $\lambda_{\text{max}} = 466 \text{ nm}$ , 20 nm full width at half maximum,  $1050 \mu\text{mol photons s}^{-1} \text{m}^{-2}$ ). Formation of lumichrome, the main product of FAD photodegradation, was assayed by HPLC. Free FAD was completely degraded after 60 min of illumination. One representative experiment shown.

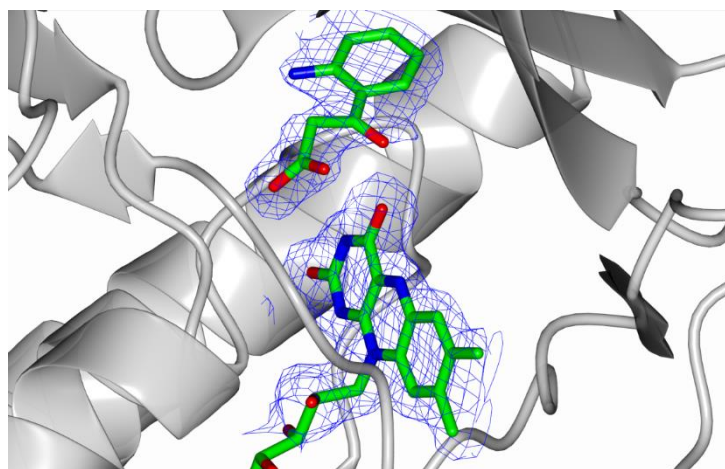

**Supplementary Figure 5:** Structure of PqsL with 2-ABA bound (PDB ID: 6SW1). Blue grid represents electron densities for 2-ABA and the flavin ring.

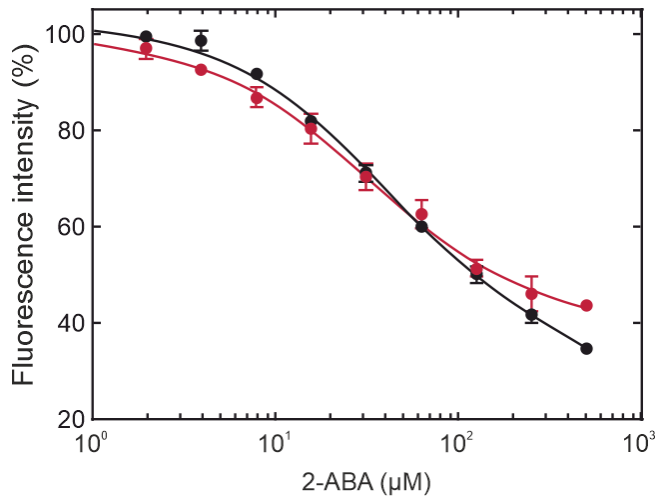

**Supplementary Figure 6:** Equilibrium titration of 2-ABA and PqsL. Changes of FAD fluorescence intensity upon 2-ABA titration to PqsL (black,  $K_d = 38.44 \pm 3.98 \mu\text{M}$ ) and PqsL-Q (red,  $K_d = 33.1 \pm 4.7 \mu\text{M}$ ). Excitation at 450 nm, 10 nm bandwidth; Emission measured at 520 nm, 10 nm bandwidth. Error bars indicate SD of three independent experiments.

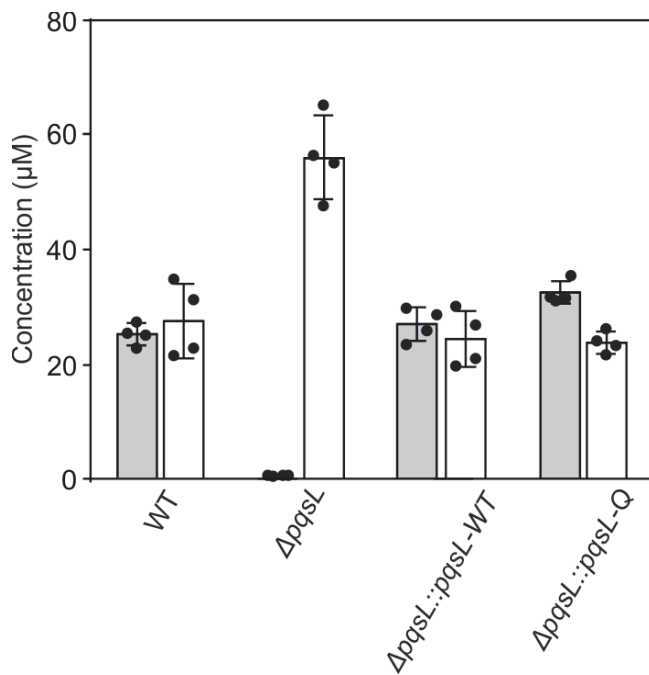

**Supplementary Figure 7:** Alkyl quinolone levels in different *Pseudomonas aeruginosa* strains. Depicted are concentrations of 2-heptyl-4-hydroxyquinoline-*N*-oxide (HQNO, gray bars) and the sum of 2-heptyl-3-hydroxy-4(1*H*)-quinolone + 2-heptyl-4(1*H*)-quinolone (PQS, HHQ, white bars) in planktonic cultures. Error bars denote SD of four biological replicates.



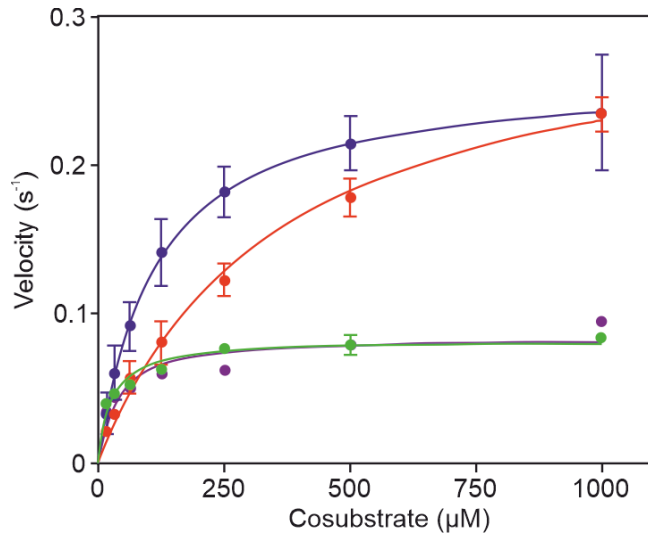

**Supplementary Figure 8:** Effects of NAD(P)H and 2-ABA on the photoreduction of PqsL-Q (LED light source). Blue: NADPH, red: NADH, green: NADPH + 200  $\mu\text{M}$  2-ABA, purple: NADH + 200  $\mu\text{M}$  2-ABA. Line traces reflect the respective Michaelis-Menten fits. Error bars indicate SD of three identical measurements.

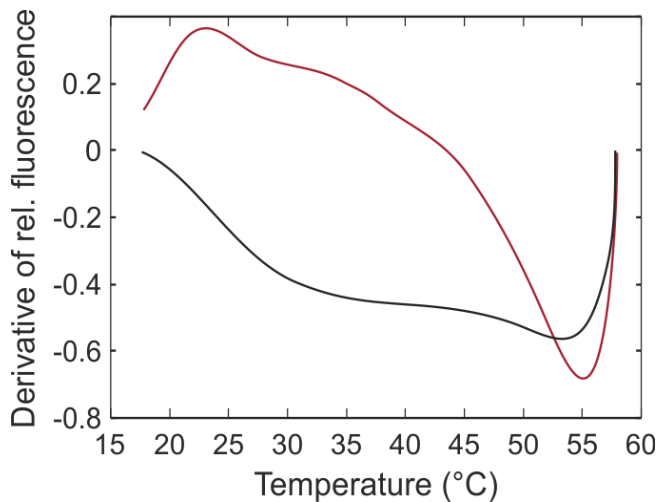

**Supplementary Figure 9:** Melting curve of PqsL (black) and PqsL-Q (red), the graph shows one representative experiment. 10  $\mu\text{M}$  of the respective enzyme in 20 mM tris-Cl pH 8.5 were gradually heated in a spectrofluorometer and the changes in fluorescence intensity were recorded ( $\lambda_{\text{ex}} = 450 \text{ nm}$ ,  $\lambda_{\text{em}} = 520 \text{ nm}$ , 10 nm bandwidth). Negative values in the melting curve indicate decrease in flavin fluorescence, which is indicative of FAD dissociation from the protein, e.g., due to protein unfolding or precipitation. Although melting temperatures of PqsL WT and PqsL-Q only differ by 1.4°C (WT 53.7°C vs 55.1°C), the gradual collapse of the PqsL WT holoprotein between 20 and 45°C does not occur in PqsL-Q, which was advantageous for spectroscopic procedures of the study and underlines the increased stability of the variant.

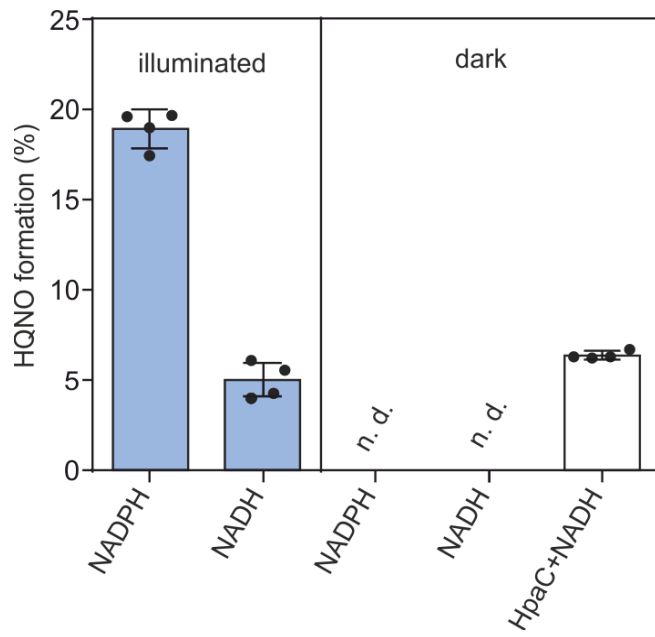

**Supplementary Figure 10:** Light-dependent product formation of PqsL-Q. Shown is the HQNO formation in the PqsL/PqsBC coupled enzyme assay. Error bars reflect SD of four independent measurements.

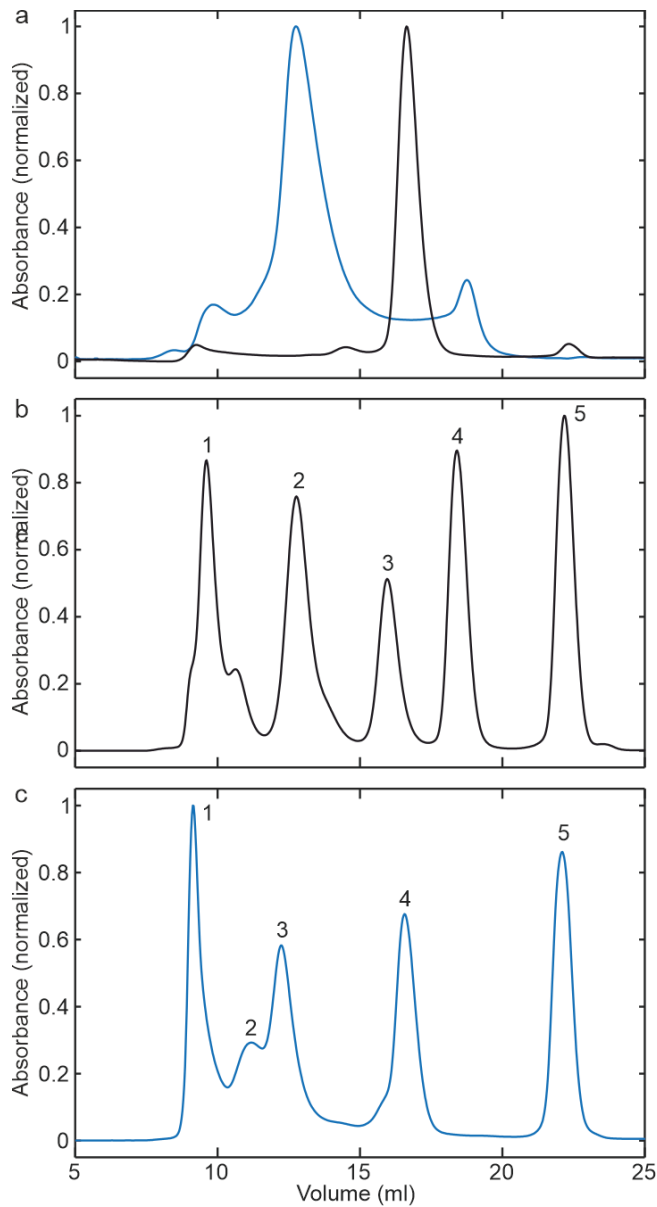

**Supplementary Figure 11:** Analytical gel filtration of PqsL. **a**, chromatograms of PqsL in 20 mM Tris-Cl pH 8.5 (blue, retention volume 12.76 ml, calculated mass 99.1 kDa) and 20 mM Tris-Cl, 150 mM NaCl pH 8.5 (black, retention volume 16.63 ml, calculated mass 34 kDa). **b**, chromatogram of the gel filtration standard (Bio-Rad, #1511901) in 20 mM Tris-Cl, 150 mM NaCl, pH 8.5. 1: thyroglobulin (670 kDa); 2:  $\gamma$ -globulin (158 kDa); 3: ovalbumin (44 kDa); 4: myoglobin (17 kDa); 5: cobalamin (1.35 kDa) **c**, chromatogram of the gel filtration standard (Bio-Rad, #1511901) in 20 mM Tris-HCl pH 8.5. Experiments were performed using a Superdex 200 Increase 10/300 GL with a constant flow rate of 0.6 ml min<sup>-1</sup> at 12 °C.

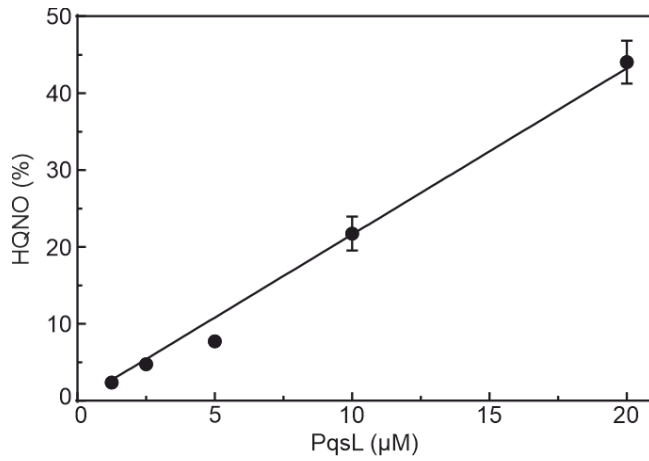

**Supplementary Figure 12:** HQNO formation in the coupled enzyme assay as function of PqsL concentration under constant illumination. Linearity suggests that no cooperative effects exist within the photoreduction within the covered concentration range. Error bars indicate SD of four independent measurements.

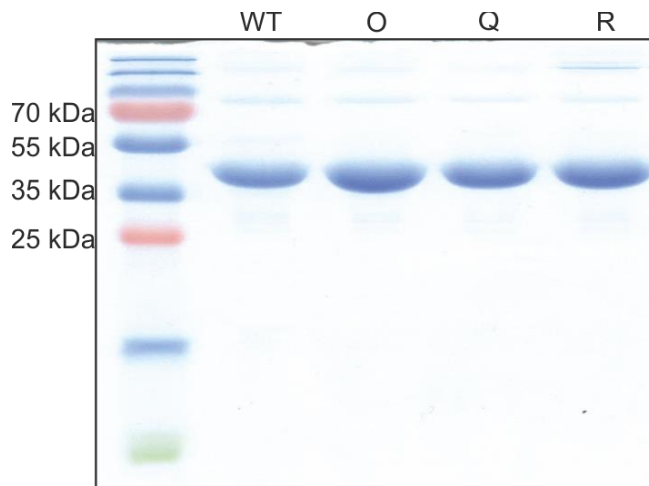

**Supplementary Figure 13:** SDS-PAGE of purified PqsL variants. 4 μg of protein loaded per lane, discontinuous 12.5% polyacrylamide gel.

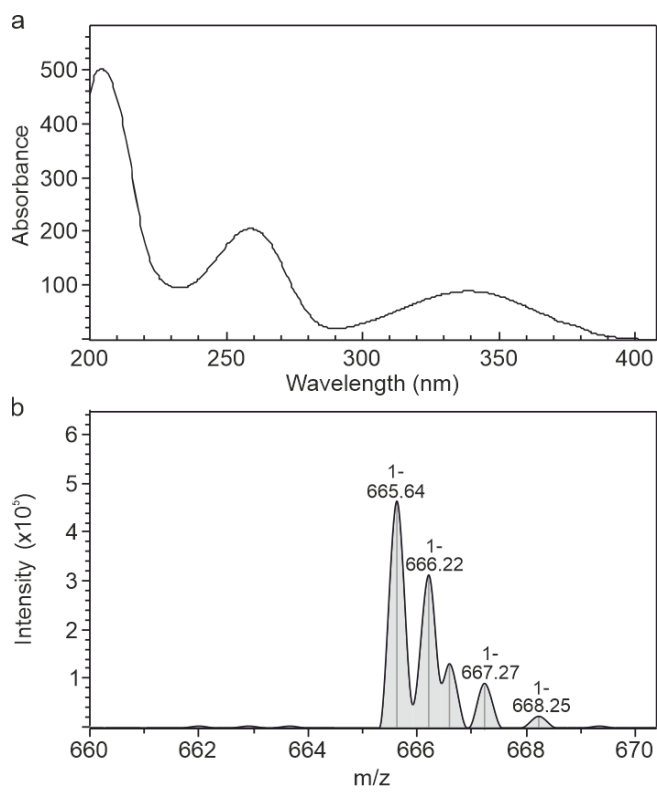

**Figure 14:** Representative UV/Vis-spectrum (a) of the synthesized reduced deuterated nicotinamide adenine dinucleotides in  $D_2O$  and the respective masses (b).
